# Supplementary material
Source: MDPI journal article supplement (https://www.mdpi.com/1999-4907/13/12/2142)
Supplement: s1 [file s1]

**Table S1** Results of analysis of variance for effects of date, temperature and initial seed moisture content on whole sample and standardized seed biomass (a), and pool sizes of those compounds standardized to 100 healthy seeds (b), concentrations of reserve compounds (starch, soluble carbohydrates, total nonstructural carbohydrates and fats (c). F-values and the associated probabilities *P* are shown for each effect and *P*<0.05 are indicated by bold font.

| <i>a) Sample and seed biomass</i>                                   |                 |    |                            |              |                                 |              |      |              |       |              |
|---------------------------------------------------------------------|-----------------|----|----------------------------|--------------|---------------------------------|--------------|------|--------------|-------|--------------|
|                                                                     |                 |    | Sample biomass<br>loss (%) |              | Biomass of 100<br>healthy seeds |              |      |              |       |              |
|                                                                     | Effect          | df | F                          | <i>P</i>     | F                               | <i>P</i>     |      |              |       |              |
|                                                                     | Storage (S)     | 4  | 182.61                     | <b>0.000</b> | 5.51                            | <b>0.001</b> |      |              |       |              |
|                                                                     | Temperature (T) | 1  | 7.54                       | <b>0.009</b> | 0.73                            | 0.399        |      |              |       |              |
|                                                                     | Moisture (M)    | 1  | 1.29                       | 0.262        | 2.77                            | 0.104        |      |              |       |              |
|                                                                     | S×T             | 4  | 2.56                       | 0.053        | 0.35                            | 0.840        |      |              |       |              |
|                                                                     | S×M             | 4  | 1.01                       | 0.414        | 0.63                            | 0.642        |      |              |       |              |
|                                                                     | T×M             | 1  | 0.31                       | 0.582        | 1.24                            | 0.271        |      |              |       |              |
|                                                                     | S×T×M           | 4  | 2.27                       | 0.079        | 0.24                            | 0.908        |      |              |       |              |
|                                                                     |                 |    |                            |              |                                 |              |      |              |       |              |
| <i>b) Pool sizes of reserve compounds (g per 100 healthy seeds)</i> |                 |    |                            |              |                                 |              |      |              |       |              |
|                                                                     |                 |    | Starch                     |              | SC                              |              | TNC  |              | Fat   |              |
|                                                                     | Effect          | df | F                          | <i>P</i>     | F                               | <i>P</i>     | F    | <i>P</i>     | F     | <i>P</i>     |
|                                                                     | Storage (S)     | 4  | 5.88                       | <b>0.000</b> | 9.17                            | <b>0.000</b> | 3.80 | <b>0.010</b> | 19.18 | <b>0.000</b> |
|                                                                     | Temperature (T) | 1  | 0.75                       | 0.390        | 21.93                           | <b>0.000</b> | 0.65 | 0.424        | 1.46  | 0.232        |
|                                                                     | Moisture (M)    | 1  | 1.74                       | 0.194        | 0.92                            | 0.343        | 0.20 | 0.656        | 0.37  | 0.544        |
|                                                                     | S×T             | 4  | 0.38                       | 0.821        | 6.05                            | <b>0.000</b> | 0.75 | 0.563        | 1.20  | 0.324        |
|                                                                     | S×M             | 4  | 0.08                       | 0.989        | 0.98                            | 0.430        | 0.09 | 0.984        | 2.77  | <b>0.040</b> |
|                                                                     | T×M             | 1  | 0.17                       | 0.681        | 0.03                            | 0.856        | 0.01 | 0.973        | 4.86  | <b>0.033</b> |
|                                                                     | S×T×M           | 4  | 0.28                       | 0.890        | 0.15                            | 0.958        | 0.14 | 0.966        | 0.61  | 0.657        |
|                                                                     |                 |    |                            |              |                                 |              |      |              |       |              |
| <i>c) Concentrations of reserve compounds (% dry mass)</i>          |                 |    |                            |              |                                 |              |      |              |       |              |
|                                                                     |                 |    | Starch                     |              | SC                              |              | TNC  |              | Fat   |              |
|                                                                     | Effect          | df | F                          | <i>P</i>     | F                               | <i>P</i>     | F    | <i>P</i>     | F     | <i>P</i>     |
|                                                                     | Storage (S)     | 4  | 2.86                       | <b>0.036</b> | 19.15                           | <b>0.000</b> | 4.53 | <b>0.004</b> | 7.41  | <b>0.000</b> |
|                                                                     | Temperature (T) | 1  | 0.08                       | 0.785        | 43.86                           | <b>0.000</b> | 4.63 | <b>0.037</b> | 0.17  | 0.686        |
|                                                                     | Moisture (M)    | 1  | 0.00                       | 0.996        | 7.27                            | <b>0.010</b> | 1.47 | 0.232        | 0.84  | 0.366        |
|                                                                     | S×T             | 4  | 0.40                       | 0.806        | 9.00                            | <b>0.000</b> | 1.41 | 0.246        | 0.37  | 0.829        |
|                                                                     | S×M             | 4  | 0.78                       | 0.543        | 3.37                            | <b>0.018</b> | 1.10 | 0.369        | 1.56  | 0.203        |
|                                                                     | T×M             | 1  | 0.51                       | 0.481        | 1.96                            | 0.169        | 1.84 | 0.182        | 1.32  | 0.259        |
|                                                                     | S×T×M           | 4  | 0.57                       | 0.690        | 0.38                            | 0.824        | 0.60 | 0.666        | 0.54  | 0.706        |

**Table S2** Concentrations of reserve compounds soluble carbohydrates (SC), starch, total nonstructural carbohydrates (TNC) and fats in stored acorns. Mean±SE.

| Storage | Moisture content | Temperature | SC, %      | Starch, %  | TNC, %     | Fat, %    |
|---------|------------------|-------------|------------|------------|------------|-----------|
| 0 mo    | Control (40%)    | –3 °C       | 5.53±0.05  | 27.53±0.40 | 33.06±0.36 | 5.67±0.23 |
|         |                  | –5 °C       | 5.53±0.05  | 27.53±0.40 | 33.06±0.36 | 5.67±0.23 |
|         | Dehydrated (38%) | –3 °C       | 6.10±0.13  | 28.41±0.37 | 34.52±0.27 | 5.34±0.07 |
|         |                  | –5 °C       | 6.10±0.13  | 28.41±0.37 | 34.52±0.27 | 5.34±0.07 |
| 4 mo    | Control (40%)    | –3 °C       | 7.79±0.60  | 30.86±1.47 | 38.64±2.03 | 6.08±0.54 |
|         |                  | –5 °C       | 7.91±0.15  | 29.68±0.82 | 37.58±0.94 | 5.49±0.14 |
|         | Dehydrated (38%) | –3 °C       | 7.12±0.05  | 30.17±0.65 | 37.29±0.61 | 5.29±0.22 |
|         |                  | –5 °C       | 7.21±0.46  | 29.76±1.40 | 36.97±1.07 | 5.51±0.12 |
| 8 mo    | Control (40%)    | –3 °C       | 6.48±0.96  | 27.41±1.91 | 33.9±2.21  | 5.61±0.20 |
|         |                  | –5 °C       | 7.97±0.31  | 27.34±0.67 | 38.48±3.86 | 5.48±0.24 |
|         | Dehydrated (38%) | –3 °C       | 6.49±0.71  | 28.5±0.34  | 34.99±0.60 | 5.43±0.21 |
|         |                  | –5 °C       | 7.31±0.62  | 28.32±0.81 | 35.63±0.10 | 5.17±0.15 |
| 12 mo   | Control (40%)    | –3 °C       | 7.18±0.31  | 28.85±0.09 | 36.03±0.37 | 5.19±0.46 |
|         |                  | –5 °C       | 10.66±0.37 | 30.16±1.03 | 40.82±1.40 | 5.06±0.38 |
|         | Dehydrated (38%) | –3 °C       | 7.07±0.62  | 29.08±1.22 | 36.15±1.46 | 5.21±0.12 |
|         |                  | –5 °C       | 9.64±0.45  | 29.76±2.00 | 39.4±2.33  | 5.33±0.11 |
| 18 mo   | Control (40%)    | –3 °C       | 6.78±0.57  | 28.58±1.97 | 35.36±2.53 | 4.61±0.30 |
|         |                  | –5 °C       | 10.04±0.61 | 29.65±0.50 | 39.69±1.05 | 4.61±0.18 |
|         | Dehydrated (38%) | –3 °C       | 5.63±0.47  | 28.94±0.42 | 34.57±0.39 | 4.75±0.21 |
|         |                  | –5 °C       | 7.58±0.24  | 26.28±2.33 | 33.85±2.57 | 5.07±0.11 |

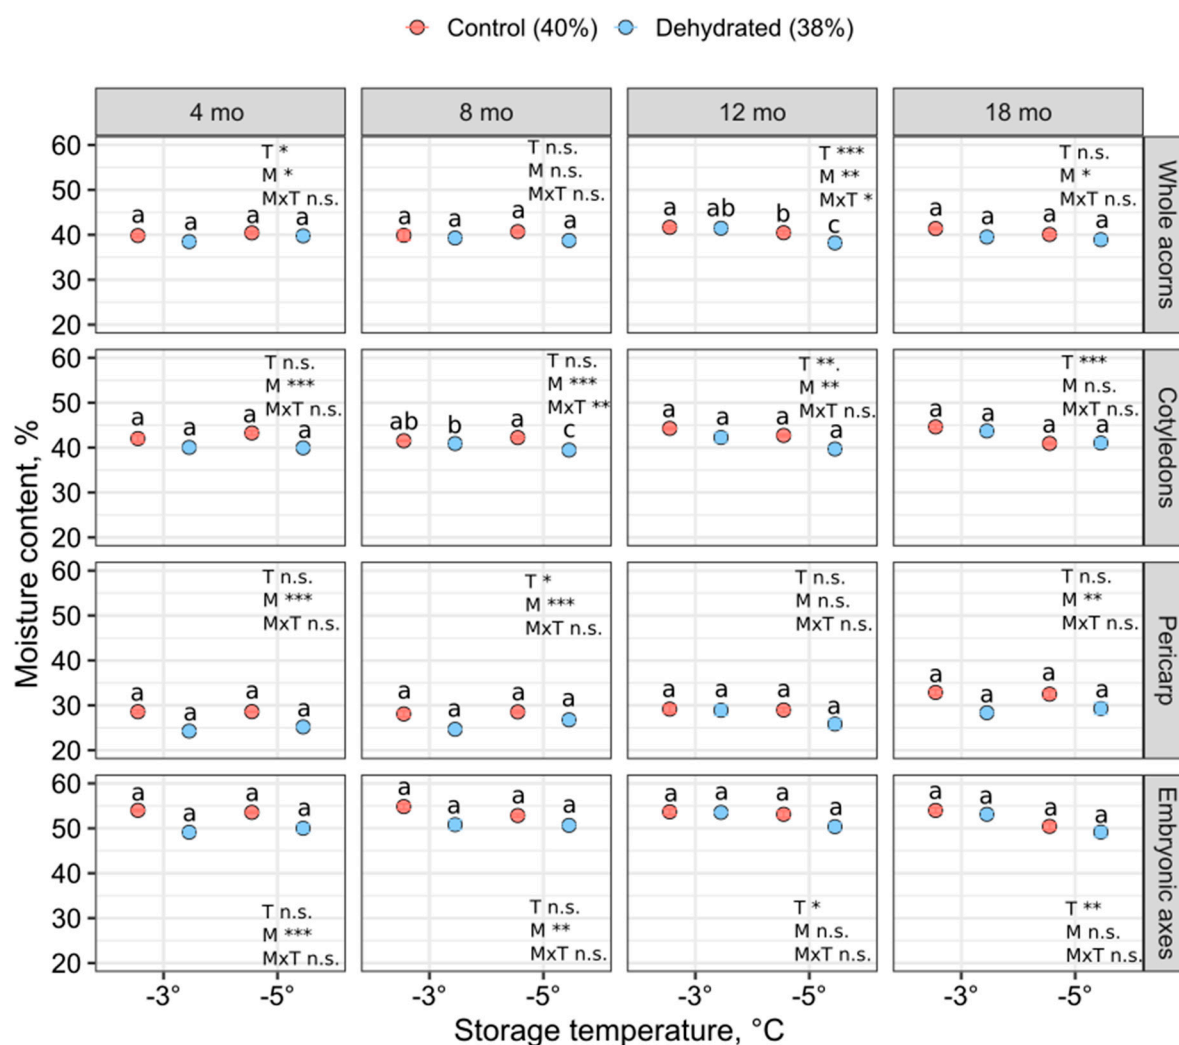

**Figure S1** Moisture content of whole acorns, cotyledons, pericarp and embryonic axes after storage at -3 °C or -5 °C. ANOVA results for interaction between storage temperature and seed moisture content MC; The same letters indicate groups that are not significantly different according to Tukey's test; Mean±SE. \*\*\*  $P<0.001$ , \*\* $P<0.01$ , \*  $P<0.05$

**Table S3** Results of analysis of variance for effects of storage (S) and seed moisture content (M) on germination capacity (a), seedling emergence (b) and seedlings biomass (c).

| a) Germination capacity |    |       |              |        |              |
|-------------------------|----|-------|--------------|--------|--------------|
|                         |    | -3 °C |              | -5 °C  |              |
| Effect                  | df | F     | P            | F      | P            |
| Storage (S)             | 4  | 6.58  | <b>0.002</b> | 14.644 | <b>0.000</b> |
| Moisture (M)            | 1  | 7.18  | <b>0.014</b> | 0.002  | 0.962        |
| S x M                   | 4  | 0.63  | 0.644        | 2.579  | 0.069        |
| b) Seedlings emergence  |    |       |              |        |              |
|                         |    | -3 °C |              | -5 °C  |              |
| Effect                  | df | F     | P            | F      | P            |
| Storage (S)             | 4  | 6.32  | <b>0.002</b> | 29.76  | <b>0.000</b> |
| Moisture (M)            | 1  | 10.56 | <b>0.004</b> | 0.008  | 0.928        |
| S x M                   | 4  | 0.44  | 0.774        | 5.55   | <b>0.004</b> |
| c) Seedlings biomass    |    |       |              |        |              |
|                         |    | -3 °C |              | -5 °C  |              |
| Effect                  | df | F     | P            | F      | P            |
| Storage (S)             | 4  | 5.12  | <b>0.001</b> | 1.47   | 0.221        |
| Moisture (M)            | 1  | 1.52  | 0.217        | 0.03   | 0.855        |
| S x M                   | 4  | 1.06  | 0.364        | 2.67   | <b>0.046</b> |
